# Supplementary material for: Congruent evolutionary responses of European steppe biota to late Quaternary climate change
Source: PubMed Central journal article supplement (PMC8993823; doi:10.1038/s41467-022-29267-8), 2022-04-08
Supplement: 41467_2022_29267_MOESM3_ESM.pdf [file 41467_2022_29267_MOESM3_ESM.pdf]

## Description of Additional Supplementary Files

**Title:** Supplementary Data 1

**Description:** The Supplementary Data file is a table that contains Individual Ids, Populations IDs, sampling localities, NCBI SRA accession codes etc.
